# Supplementary material for: Myotoxin-3 from the Pacific Rattlesnake Crotalus oreganus oreganus Venom Is a New Microtubule-Targeting Agent
Source: MDPI journal article supplement (doi:10.3390/molecules27238241), 2022-11-25
Supplement: s1 [file s1]

## Legends to Supplementary Files

**Figure S1:** *Bioassay-guided screening of active fractions from Crotalus oreganus venom*

**A)** HPLC fractions from venom were submitted to tubulin polymerization assay in the presence of DAPI. The increase in fluorescence indicates tubulin polymerization. All the activity was found on fraction B4. **B)** Combined profiles of sub-fractions of B4, loaded separately on analytical HPLC column. **C)** Sub-fractions of B4 were submitted to tubulin polymerization assay in the presence of DAPI. Most of the activity was found in sub-fraction B4-24.

**Video S1:** *z-stack images from MCF-7 cells transiently transfected with a farnesyl-GFP plasmid to visualize the cell membrane and incubated with Cy3-myotoxin-3*

**Video S2:** *Dynamic instability of individual microtubules in MCF-7 cells transiently expressing GFP-tagged tubulin (control)*

**Video S3:** *Dynamic instability of individual microtubules in MCF-7 cells transiently expressing GFP-tagged tubulin (in the presence of 25  $\mu$ M myotoxin-3)*
