# Supplementary figures and images for: Myotoxin-3 from the Pacific Rattlesnake Crotalus oreganus oreganus Venom Is a New Microtubule-Targeting Agent
Source: MDPI journal article supplement (doi:10.3390/molecules27238241), 2022-11-25

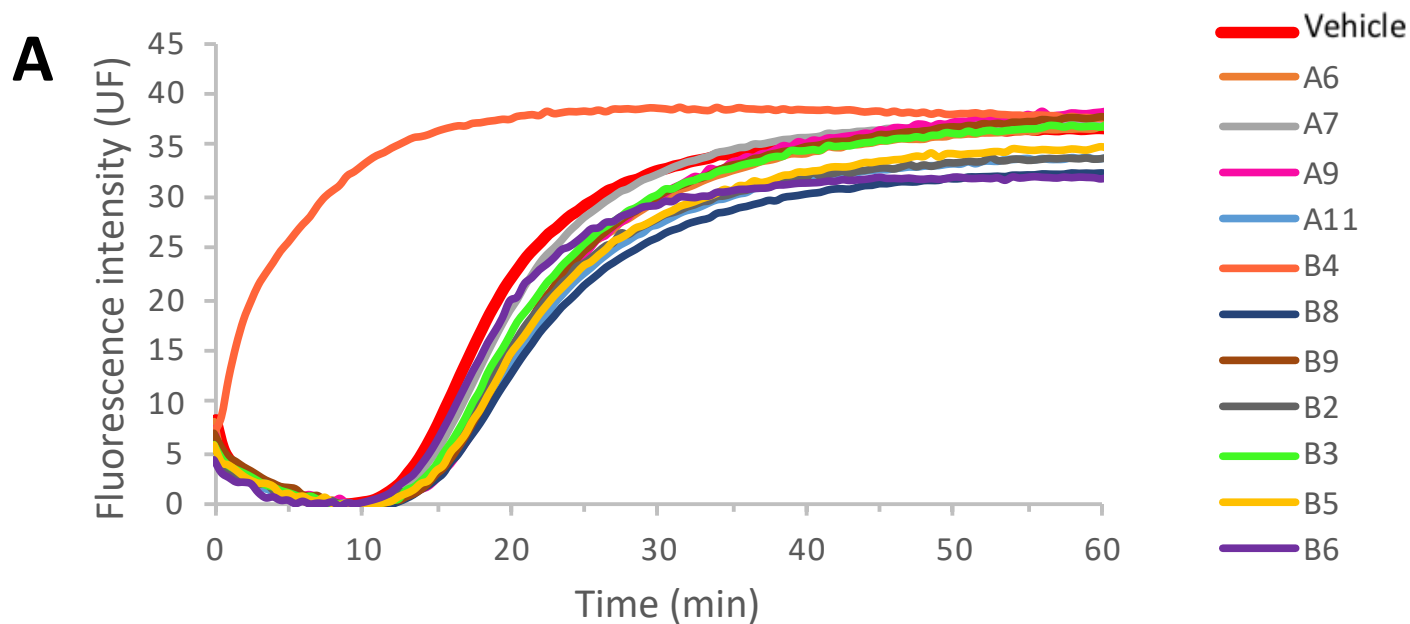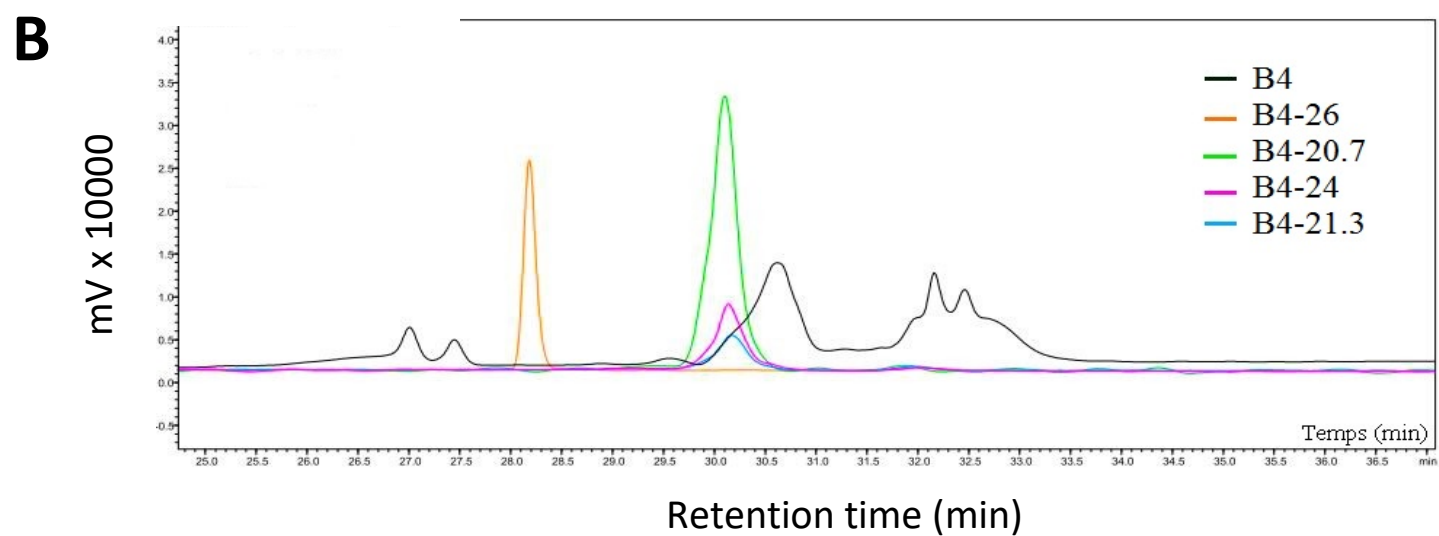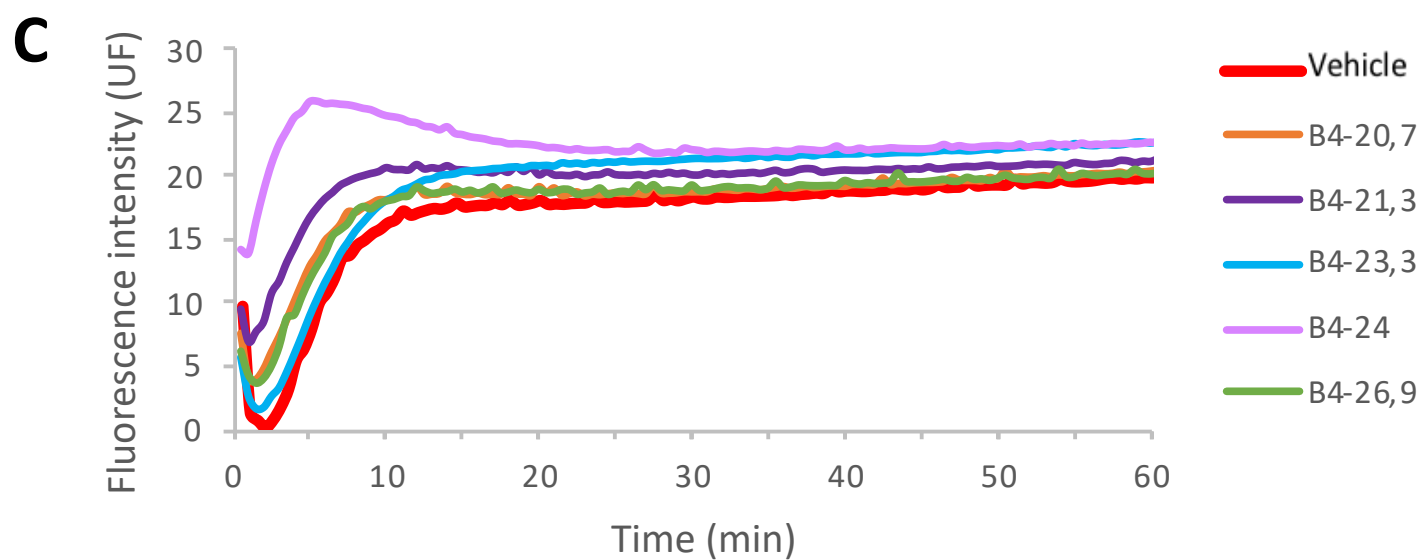

Supplement: s1 [file s1]
